# Supplementary material for: Clean hydrogen production from ammonia decomposition over zeolite 13X-supported Ni catalysts
Source: Royal Society of Chemistry journal article supplement (doi:10.1039/d3se01426f), 2024-01-01
Supplement: d3se01426f1.pdf [file d3se01426f1.pdf]

## Supporting Information

### **Clean hydrogen production from ammonia decomposition over zeolite 13X-supported Ni catalysts**

Jiyu Kim,<sup>ab</sup> Kyoung Deok Kim,<sup>ac</sup> Unho Jung,<sup>a\*</sup> Yongha Park,<sup>a</sup> Ki Bong Lee,<sup>b\*</sup> and Kee Young Koo<sup>ad\*</sup>

<sup>a</sup>Hydrogen Research Department, Korea Institute of Energy Research (KIER), 152 Gajeong-ro, Yuseong-gu, Daejeon 34129, Republic of Korea

<sup>b</sup>Department of Chemical & Biological Engineering, Korea University, 145 Anam-dong, Seongbuk-Gu, Seoul 02841, Republic of Korea

<sup>c</sup>Graduate School of Energy Science and Technology, Chungnam National University(CNU), 99 Daehak-ro, Yuseong-gu, Daejeon 34134, Republic of Korea

<sup>d</sup>Advanced Energy and System Engineering, University of Science and Technology (UST), 217 Gajeong-ro, Yuseong-gu, Daejeon 34113, Republic of Korea

\*Corresponding Authors.

E-mail addresses: kykoo@kier.re.kr (K. Y. K.); uhjung@kier.re.kr (U. J.); kibonglee@korea.ac.kr (K. B. L.)

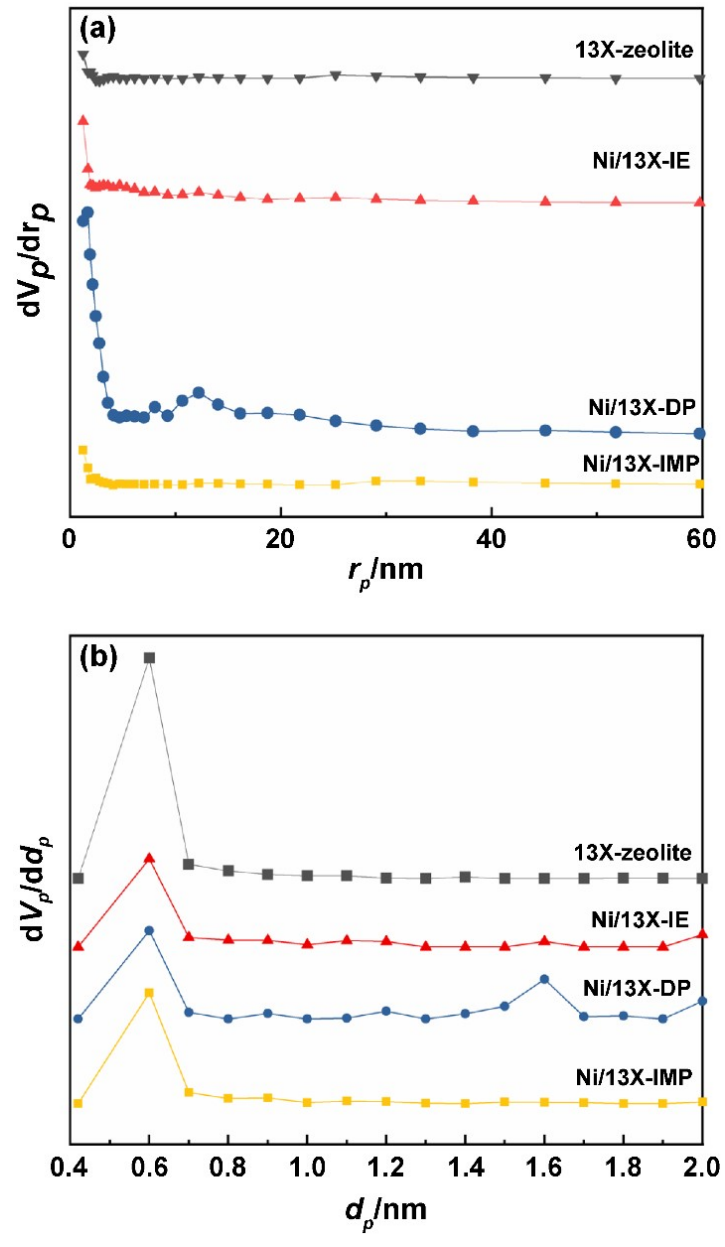

Figure S1. Pore size distribution of Ni/zeolite 13X catalysts.

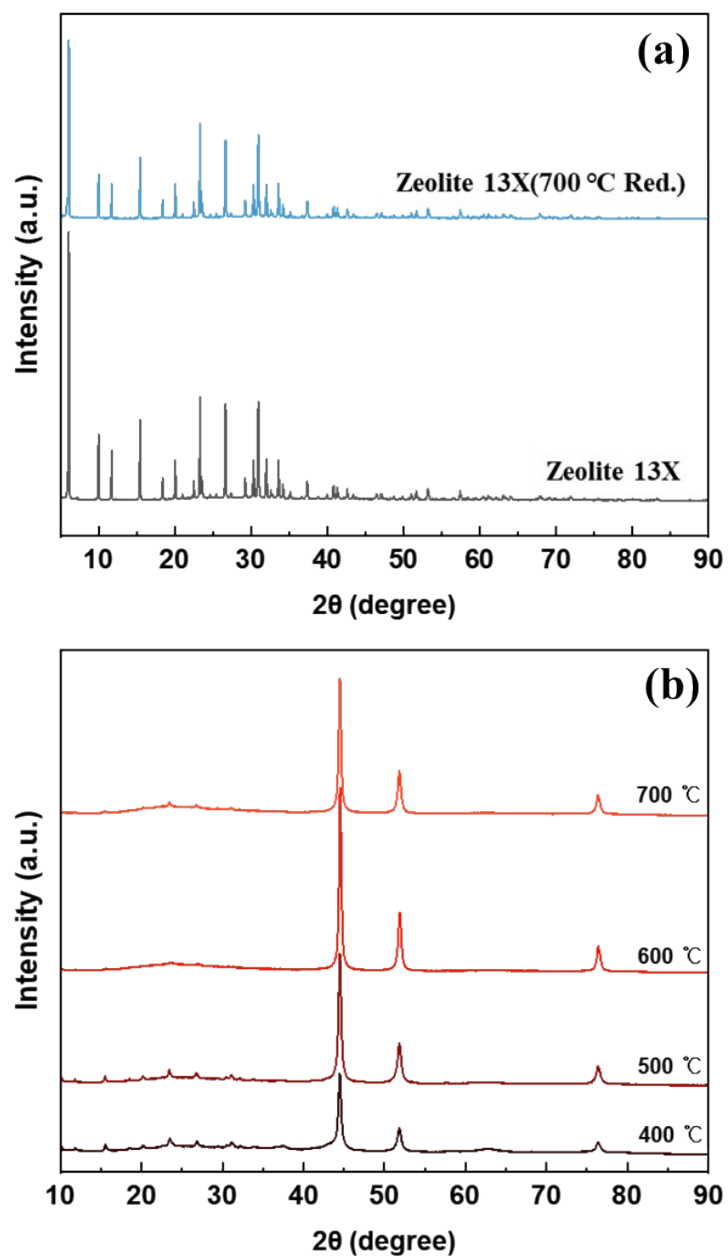

**Figure S2.** XRD patterns of (a) fresh and reduced (700 °C, 10% H<sub>2</sub>/N<sub>2</sub>) zeolite 13X and (b) Ni/13X-DP according to reduction temperature (400 – 700 °C).

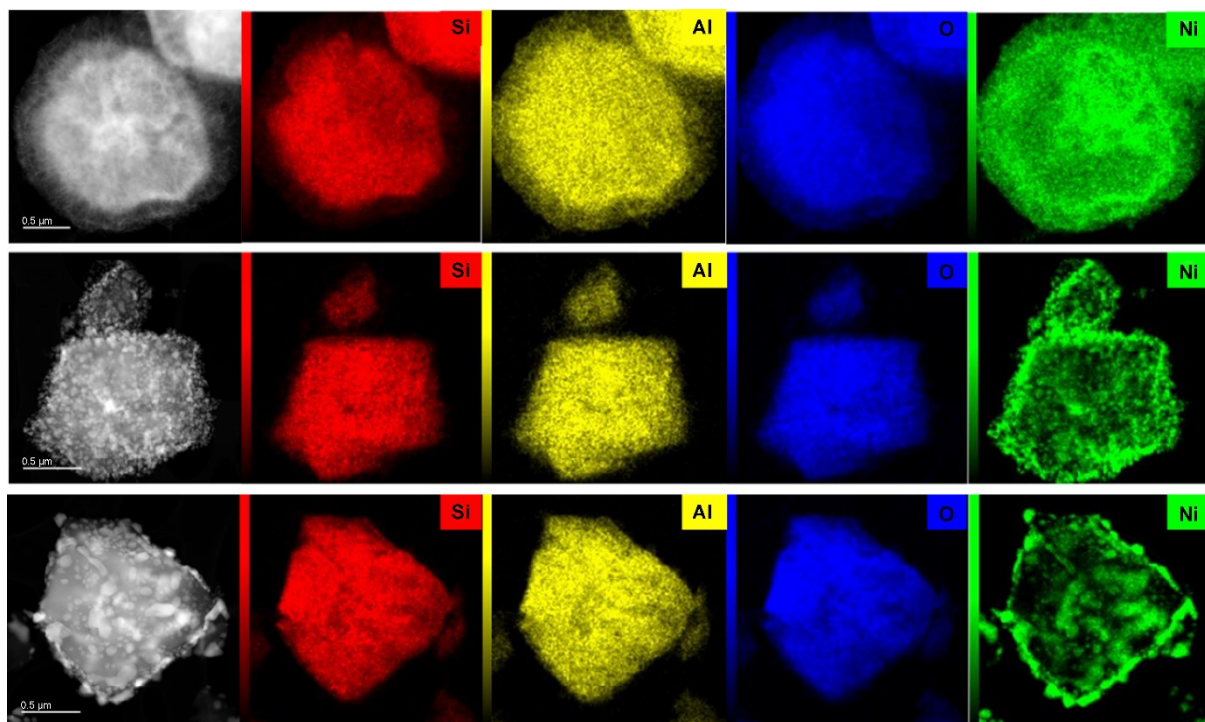

**Figure S3.** TEM elemental mapping image of recued (a) Ni/13X-IE, (b) Ni/13X-DP, and (c) Ni/13X-IMP.

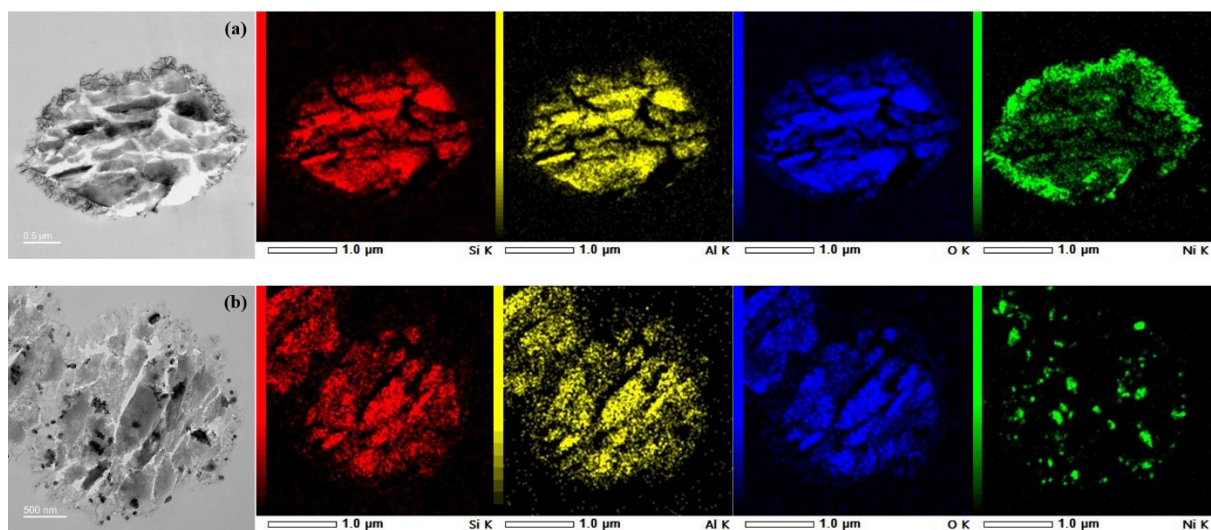

**Figure S4.** Cross-sectional TEM elemental mapping image of (a) calcined and (b) reduced Ni/13X-DP with ultra-microtome pretreatment.

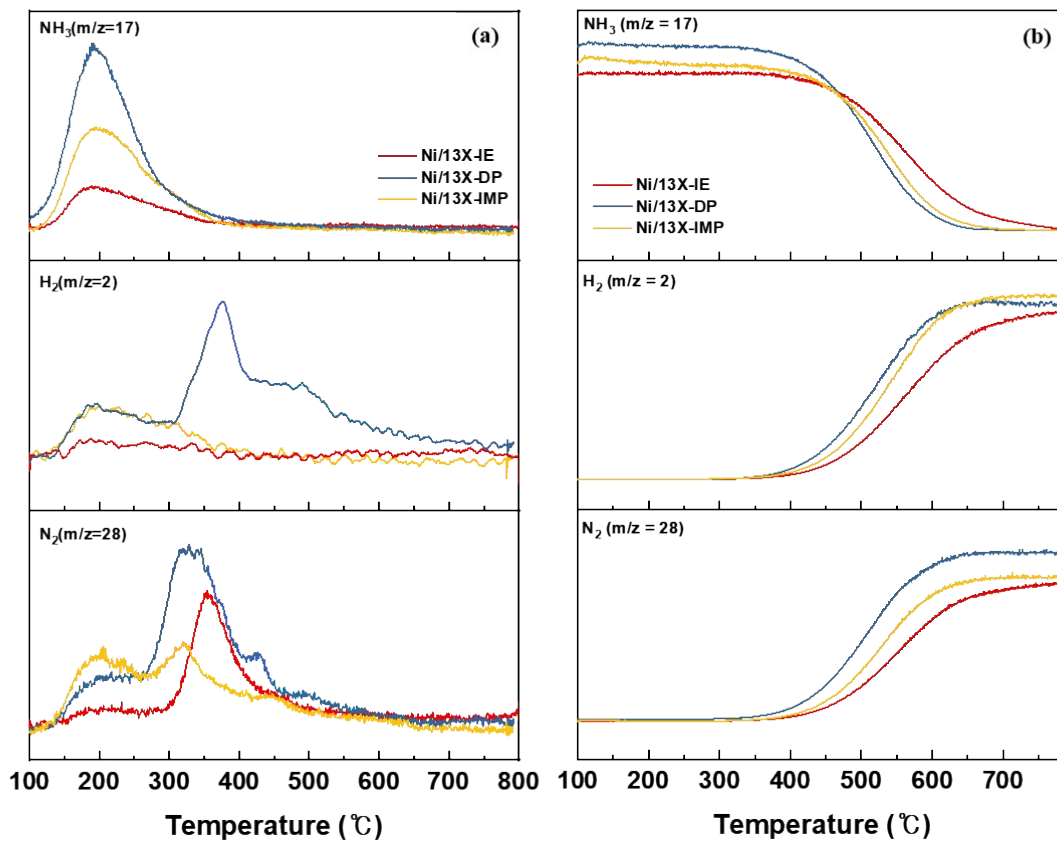

**Figure S5.** (a)  $\text{NH}_3$ - TPD-MS and (b)  $\text{NH}_3$ -TPSR-MS profiles of Ni/zeolite 13X catalysts with different preparation method.

**Table S1.** H<sub>2</sub> reduction temperature peak of Ni/zeolite 13X catalysts

| Ni/zeolite 13X<br>catalyst | Peak $\alpha$ |                 | Peak $\beta$  |                 | Peak $\gamma$ |                 |
|----------------------------|---------------|-----------------|---------------|-----------------|---------------|-----------------|
|                            | Temp.<br>(°C) | Fraction<br>(%) | Temp.<br>(°C) | Fraction<br>(%) | Temp.<br>(°C) | Fraction<br>(%) |
| <b>Ni/13X-IE</b>           | 381           | 0.99            | 541           | 36.97           | 651           | 62.04           |
| <b>Ni/13X-DP</b>           | 381           | 17.84           | 545           | 70.72           | 709           | 11.44           |
| <b>Ni/13X-IMP</b>          | 378           | 71.17           | 589           | 28.83           | -             | -               |

**Table S2.** Comparison of catalytic performance of Ni-based catalysts for NH<sub>3</sub> decomposition at 600 °C and WHSV of 30000 mL g<sub>cat</sub><sup>-1</sup> h<sup>-1</sup>.

| Number | Catalyst                 | Ni loading (wt%) | Method                                | NH <sub>3</sub> Conversion (%) | H <sub>2</sub> Formation rate (mmol g <sub>cat</sub> <sup>-1</sup> min <sup>-1</sup> ) | Ref.      |
|--------|--------------------------|------------------|---------------------------------------|--------------------------------|----------------------------------------------------------------------------------------|-----------|
| 1      | Ni/MRM-600               | 15.0             | Precipitation                         | 55.0                           | 18.4                                                                                   | 1         |
| 2      | Ni/SiO <sub>2</sub>      | 10.0             | Wet impregnation                      | 36.4                           | 11.4                                                                                   | 2         |
| 3      | S60/1.0Mg/10Ni/USY       | 10               | Surfactant-assisted melt infiltration | 52                             | -                                                                                      | 3         |
| 4      | Ni/rGO                   | 25               | Sonication                            | 74.2                           | 24.8                                                                                   | 4         |
| 5      | Ni/AC                    | 10               | Sonication                            | 40.9                           | 13.7                                                                                   | 4         |
| 6      | Ni/BN                    | 8.9              | Sol-gel method                        | 48.1                           | 16.1                                                                                   | 5         |
| 7      | Ni/SiO <sub>2</sub> -AEH | 10.0             | ammonia evaporation-hydrothermal      | 50                             | 16                                                                                     | 6         |
| 8      | Ni/13X-DP                | 14.8             | Deposition Precipitation              | 68.3                           | 22.9                                                                                   | This work |

#### References

1. J.-L. Cao, Z.-L. Yan, Q.-F. Deng, Z.-Y. Yuan, Y. Wang, G. Sun, X.-D. Wang, B. Hari and Z.-Y. Zhang, *Catal. Sci. Technol.*, 2014, **4**, 361.
2. T.V Choudhary, C. Sivadinarayana and D. W. Goodman, *Catal. Lett.*, 2001, **72**, 197.
3. E. H. Cho, N. Jeon, B. S. Yoon, S. Kim, Y. Yun and C. H. Ko, *Appl. Surf. Sci.*, 2023, **608**, 155244.
4. T. Meng, Q.-Q. Xu, Y.-T. Li, J.-L. Chang, T.-Z. Ren and Z.-Y. Yuan, *J. Ind. Eng. Chem.*, 2015, **32**, 373.
5. C. Zhou, K. Wu, H. Huang, C.-F. Cao, Y. Luo, C.-Q. Chen, ...L. Lin, C. Au and L. Jiang, *ACS Catal.*, 2021, **11**, 10345.
6. H. Ren, J. Cheng, H. Fang, F. Zhong, C. Chen, L. Lin and X. Lin, *Appl. Catal. A*, 2023, **664**, 119344.
